# Supplementary material for: Synthesis of platinum(ii)-complex end-tethered polymers: spectroscopic properties and nanostructured particles
Source: Royal Society of Chemistry journal article supplement (doi:10.1039/d3sm00247k), 2023-01-01
Supplement: d3sm00247k1.pdf [file d3sm00247k1.pdf]

## Electronic Supplementary Information

### Synthesis of platinum(II)-complex end-tethered polymers: Spectroscopic properties and nanostructured particles

Shengchao Qiu,<sup>a</sup> Hua Xue,<sup>a</sup> Ran Wang,<sup>a</sup> Chi Zhang,<sup>a</sup> Qun He,<sup>\*a</sup> Guanjun Chang<sup>b</sup> and Weifeng Bu<sup>\*ac</sup>

<sup>a</sup> State Key Laboratory of Applied Organic Chemistry, Key Laboratory of Nonferrous Metals Chemistry and Resources Utilization of Gansu Province, and College of Chemistry and Chemical Engineering, Lanzhou University, Lanzhou, 730000, China.

<sup>b</sup> State Key Laboratory of Solid Lubrication, Lanzhou Institute of Chemical Physics, Chinese

<sup>c</sup> Academy of Sciences, Lanzhou, 730000, China. State Key Laboratory of Solid Lubrication, Lanzhou Institute of Chemical Physics, Chinese Academy of Sciences, Lanzhou, 730000, China

Email: [hequn@lzu.edu.cn](mailto:hequn@lzu.edu.cn); [buwf@lzu.edu.cn](mailto:buwf@lzu.edu.cn)

#### EXPERIMENTAL SECTION

##### Measurements.

<sup>1</sup>H NMR spectra were recorded on a JNM-ESC400 instrument, in which tetramethylsilane (TMS) was used as an internal standard and d-chloroform (CDCl<sub>3</sub>) as a solvent. Matrix-assisted laser desorption/ionization time-of-flight (MALDI-TOF) mass spectra were performed on a Bruker ultraflexxtreme. Gel permeation chromatography (SEC) experiments were recorded on a Waters 1515 instrument and the values of number-average molecular weight ( $M_n$ ), weight-average molecular weight ( $M_w$ ), and polydispersity index ( $\mathcal{D}$ ) of **PS<sub>n</sub>L-I**, and **PS<sub>n</sub>L-II** were determined using polystyrene as a calibration standard. Tetrahydrofuran (THF) was used as eluent at a flow rate of 1.0 mL/min and the column temperature was controlled to be 40 °C. Fourier transformation infrared (FT-IR) spectra experiments were recorded on a Nicolet NEXUS 670. UV-vis absorption spectra were carried out using a SHIMADZU UV-2550 spectrophotometer. All luminescence measurements were made using a Hitachi-7000 spectrofluorometer. The diameters ( $D_h$ ) of particles in chloroform/methanol mixed solvent was obtained using a dynamic light scattering (DLS) instrument performed on a Brookhaven 90Plus Pals spectrometer. Transmission electron microscopy (TEM) experiments were conducted on an FEI Talos F200s operating at 200 kV. All measurements were carried out at room temperature except for SEC experiments.

##### Characterization Details

**PS<sub>14</sub>L-I**: Yield: 198 mg, 90%. <sup>1</sup>H NMR (400 MHz, CDCl<sub>3</sub>):  $\delta$  8.37 (t,  $J$  = 8.0 Hz, 2H, Ar), 8.06 (t,  $J$  = 8.0 Hz, 1H, Ar), 7.87 (d,  $J$  = 8.0 Hz, 2H, Ar), 7.46 (d,  $J$  = 8.0 Hz, 2H, Ar), 7.36 (m, 4H), 6.36 – 7.08 (br, 70H, –C<sub>6</sub>H<sub>5</sub>), 5.11 (m, 1H, –ArCH–), 4.77 (t,  $J$  = 7.4 Hz, 2H, –NCH<sub>2</sub>–), 4.19 (s, 3H, –NCH<sub>3</sub>), 3.93 (t,  $J$  = 6.5 Hz, 2H, –OCH<sub>2</sub>–), 3.63 (m, 2H, –CH<sub>2</sub>–) 1.25 – 2.18 (br, 65H, –CH<sub>2</sub>–, –CHCH<sub>2</sub>–).  $M_{n,NMR}$  = 2200 g mol<sup>-1</sup>,  $M_{n,SEC}$  = 2000 g mol<sup>-1</sup>,  $\mathcal{D}$  = 1.11.

**PS<sub>19</sub>L-I**: Yield: 252 mg, 90%. <sup>1</sup>H NMR (400 MHz, CDCl<sub>3</sub>):  $\delta$  8.37 (t,  $J$  = 8.0 Hz, 2H, Ar), 8.06

(t,  $J = 8.0$  Hz, 1H, Ar), 7.87 (d,  $J = 8.0$  Hz, 2H, Ar), 7.46 (d,  $J = 8.0$  Hz, 2H, Ar), 7.36 (m, 4H), 6.36 – 7.08 (br, 95H,  $-C_6H_5$ ), 5.11 (m, 1H,  $-ArCH-$ ), 4.77 (t,  $J = 7.4$  Hz, 2H,  $-NCH_2-$ ), 4.19 (s, 3H,  $-NCH_3$ ), 3.93 (t,  $J = 6.5$  Hz, 2H,  $-OCH_2-$ ), 3.63 (m, 2H,  $-CH_2-$ ) 1.25 – 2.18 (br, 79H,  $-CH_2-$ ,  $-CHCH_2-$ ).  $M_{n,NMR} = 2800$  g mol $^{-1}$ ,  $M_{n,SEC} = 2600$  g mol $^{-1}$ ,  $D = 1.06$ .

**PS<sub>24</sub>L-I:** Yield: 310 mg, 91%.  $^1H$  NMR (400 MHz,  $CDCl_3$ ):  $\delta$  8.37 (t,  $J = 8.0$  Hz, 2H, Ar), 8.06 (t,  $J = 8.0$  Hz, 1H, Ar), 7.87 (d,  $J = 8.0$  Hz, 2H, Ar), 7.46 (d,  $J = 8.0$  Hz, 2H, Ar), 7.36 (m, 4H), 6.36 – 7.08 (br, 120H,  $-C_6H_5$ ), 5.11 (m, 1H,  $-ArCH-$ ), 4.77 (t,  $J = 7.4$  Hz, 2H,  $-NCH_2-$ ), 4.19 (s, 3H,  $-NCH_3$ ), 3.93 (t,  $J = 6.5$  Hz, 2H,  $-OCH_2-$ ), 3.63 (m, 2H,  $-CH_2-$ ) 1.25 – 2.18 (br, 95H,  $-CH_2-$ ,  $-CHCH_2-$ ).  $M_{n,NMR} = 3200$  g mol $^{-1}$ ,  $M_{n,SEC} = 3300$  g mol $^{-1}$ ,  $D = 1.10$ .

**PS<sub>34</sub>L-I:** Yield: 391 mg, 91%.  $^1H$  NMR (400 MHz,  $CDCl_3$ ):  $\delta$  8.37 (t,  $J = 8.0$  Hz, 2H, Ar), 8.06 (t,  $J = 8.0$  Hz, 1H, Ar), 7.87 (d,  $J = 8.0$  Hz, 2H, Ar), 7.46 (d,  $J = 8.0$  Hz, 2H, Ar), 7.36 (m, 4H), 6.36 – 7.08 (br, 170H,  $-C_6H_5$ ), 5.11 (m, 1H,  $-ArCH-$ ), 4.77 (t,  $J = 7.4$  Hz, 2H,  $-NCH_2-$ ), 4.19 (s, 3H,  $-NCH_3$ ), 3.93 (t,  $J = 6.5$  Hz, 2H,  $-OCH_2-$ ), 3.63 (m, 2H,  $-CH_2-$ ) 1.25 – 2.18 (br, 125H,  $-CH_2-$ ,  $-CHCH_2-$ ).  $M_{n,NMR} = 4300$  g mol $^{-1}$ ,  $M_{n,SEC} = 4300$  g mol $^{-1}$ ,  $D = 1.07$ .

**PS<sub>41</sub>L-I:** Yield: 460 mg, 92%.  $^1H$  NMR (400 MHz,  $CDCl_3$ ):  $\delta$  8.37 (t,  $J = 8.0$  Hz, 2H, Ar), 8.06 (t,  $J = 8.0$  Hz, 1H, Ar), 7.87 (d,  $J = 8.0$  Hz, 2H, Ar), 7.46 (d,  $J = 8.0$  Hz, 2H, Ar), 7.36 (m, 4H), 6.36 – 7.08 (br, 205H,  $-C_6H_5$ ), 5.11 (m, 1H,  $-ArCH-$ ), 4.77 (t,  $J = 7.4$  Hz, 2H,  $-NCH_2-$ ), 4.19 (s, 3H,  $-NCH_3$ ), 3.93 (t,  $J = 6.5$  Hz, 2H,  $-OCH_2-$ ), 3.63 (m, 2H,  $-CH_2-$ ) 1.25 – 2.18 (br, 147H,  $-CH_2-$ ,  $-CHCH_2-$ ).  $M_{n,NMR} = 5000$  g mol $^{-1}$ ,  $M_{n,SEC} = 5100$  g mol $^{-1}$ ,  $D = 1.08$ .

**PS<sub>53</sub>L-I:** Yield: 586 mg, 93%.  $^1H$  NMR (400 MHz,  $CDCl_3$ ):  $\delta$  8.37 (t,  $J = 8.0$  Hz, 2H, Ar), 8.06 (t,  $J = 8.0$  Hz, 1H, Ar), 7.87 (d,  $J = 8.0$  Hz, 2H, Ar), 7.46 (d,  $J = 8.0$  Hz, 2H, Ar), 7.36 (m, 4H), 6.36 – 7.08 (br, 265H,  $-C_6H_5$ ), 5.11 (m, 1H,  $-ArCH-$ ), 4.77 (t,  $J = 7.4$  Hz, 2H,  $-NCH_2-$ ), 4.19 (s, 3H,  $-NCH_3$ ), 3.93 (t,  $J = 6.5$  Hz, 2H,  $-OCH_2-$ ), 3.63 (m, 2H,  $-CH_2-$ ) 1.25 – 2.18 (br, 185H,  $-CH_2-$ ,  $-CHCH_2-$ ).  $M_{n,NMR} = 6300$  g mol $^{-1}$ ,  $M_{n,SEC} = 6300$  g mol $^{-1}$ ,  $D = 1.08$ .

**PS<sub>73</sub>L-I:** Yield: 790 mg, 94%.  $^1H$  NMR (400 MHz,  $CDCl_3$ ):  $\delta$  8.37 (t,  $J = 8.0$  Hz, 2H, Ar), 8.06 (t,  $J = 8.0$  Hz, 1H, Ar), 7.87 (d,  $J = 8.0$  Hz, 2H, Ar), 7.46 (d,  $J = 8.0$  Hz, 2H, Ar), 7.36 (m, 4H), 6.36 – 7.08 (br, 365H,  $-C_6H_5$ ), 5.11 (m, 1H,  $-ArCH-$ ), 4.77 (t,  $J = 7.4$  Hz, 2H,  $-NCH_2-$ ), 4.19 (s, 3H,  $-NCH_3$ ), 3.93 (t,  $J = 6.5$  Hz, 2H,  $-OCH_2-$ ), 3.63 (m, 2H,  $-CH_2-$ ) 1.25 – 2.18 (br, 185H,  $-CH_2-$ ,  $-CHCH_2-$ ).  $M_{n,NMR} = 8400$  g mol $^{-1}$ ,  $M_{n,SEC} = 8400$  g mol $^{-1}$ ,  $D = 1.07$ .

**PS<sub>14</sub>L-II:** Yield: 207 mg, 90%.  $^1H$  NMR (400 MHz,  $CDCl_3$ ):  $\delta$  7.93 (s, 2H, Ar), 7.88 (d,  $J = 8.0$  Hz, 2H, Ar), 7.46 (d,  $J = 8.0$  Hz, 2H, Ar), 7.36 (m, 4H, Ar), 6.36 – 7.08 (br, 70H,  $-C_6H_5$ ), 5.11 (m, 1H,  $-ArCH-$ ), 4.24 (s, 8H,  $-NCH_3$ ,  $-PyOCH_2-$ ), 3.97 (t, 2H,  $J = 6.6$  Hz,  $-OCH_2-$ ), 3.63 (m, 2H,  $-CH_2-$ ), 1.25 – 2.18 (br, 63H,  $-CH_2-$ ,  $-CHCH_2-$ ).  $M_{n,NMR} = 2300$  g mol $^{-1}$ ,  $M_{n,SEC} = 2100$  g mol $^{-1}$ ,  $D = 1.11$ .

**PS<sub>19</sub>L-II:** Yield: 252 mg, 90%.  $^1H$  NMR (400 MHz,  $CDCl_3$ ):  $\delta$  7.93 (s, 2H, Ar), 7.88 (d,  $J = 8.0$  Hz, 2H, Ar), 7.46 (d,  $J = 8.0$  Hz, 2H, Ar), 7.36 (m, 4H, Ar), 6.36 – 7.08 (br, 95H,  $-C_6H_5$ ), 5.11 (m, 1H,  $-ArCH-$ ), 4.24 (s, 8H,  $-NCH_3$ ,  $-PyOCH_2-$ ), 3.97 (t, 2H,  $J = 6.6$  Hz,  $-OCH_2-$ ), 3.63 (m, 2H,  $-CH_2-$ ), 1.25 – 2.18 (br, 78H,  $-CH_2-$ ,  $-CHCH_2-$ ).  $M_{n,NMR} = 2800$  g mol $^{-1}$ ,  $M_{n,SEC} = 2600$  g mol $^{-1}$ ,  $D = 1.07$ .

**PS<sub>24</sub>L-II:** Yield: 303 mg, 92%.  $^1H$  NMR (400 MHz,  $CDCl_3$ ):  $\delta$  7.93 (s, 2H, Ar), 7.88 (d,  $J = 8.0$  Hz, 2H, Ar), 7.46 (d,  $J = 8.0$  Hz, 2H, Ar), 7.36 (m, 4H, Ar), 6.36 – 7.08 (br, 120H,  $-C_6H_5$ ), 5.11 (m, 1H,  $-ArCH-$ ), 4.24 (s, 8H,  $-NCH_3$ ,  $-PyOCH_2-$ ), 3.97 (t, 2H,  $J = 6.6$  Hz,  $-OCH_2-$ ), 3.63 (m, 2H,  $-CH_2-$ ), 1.25 – 2.18 (br, 94H,  $-CH_2-$ ,  $-CHCH_2-$ ).  $M_{n,NMR} = 3300$  g mol $^{-1}$ ,  $M_{n,SEC} = 3100$  g mol $^{-1}$ ,  $D = 1.08$ .

**PS<sub>34</sub>L-II:** Yield: 400 mg, 93%. <sup>1</sup>H NMR (400 MHz, CDCl<sub>3</sub>): δ 7.93 (s, 2H, Ar), 7.88 (d, *J* = 8.0 Hz, 2H, Ar), 7.46 (d, *J* = 8.0 Hz, 2H, Ar), 7.36 (m, 4H, Ar), 6.36 – 7.08 (br, 170H, –C<sub>6</sub>H<sub>5</sub>), 5.11 (m, 1H, –ArCH–), 4.24 (s, 8H, –NCH<sub>3</sub>, –PyOCH<sub>2</sub>–), 3.97 (t, 2H, *J* = 6.6 Hz, –OCH<sub>2</sub>–), 3.63 (m, 2H, –CH<sub>2</sub>–), 1.25 – 2.18 (br, 123H, –CH<sub>2</sub>–, –CHCH<sub>2</sub>–). *M*<sub>n,NMR</sub> = 4400 g mol<sup>–1</sup>, *M*<sub>n,SEC</sub> = 4500 g mol<sup>–1</sup>, *D* = 1.07.

**PS<sub>41</sub>L-II:** Yield: 470 mg, 92%. <sup>1</sup>H NMR (400 MHz, CDCl<sub>3</sub>): δ 7.93 (s, 2H, Ar), 7.88 (d, *J* = 8.0 Hz, 2H, Ar), 7.46 (d, *J* = 8.0 Hz, 2H, Ar), 7.36 (m, 4H, Ar), 6.36 – 7.08 (br, 205H, –C<sub>6</sub>H<sub>5</sub>), 5.11 (m, 1H, –ArCH–), 4.24 (s, 8H, –NCH<sub>3</sub>, –PyOCH<sub>2</sub>–), 3.97 (t, 2H, *J* = 6.6 Hz, –OCH<sub>2</sub>–), 3.63 (m, 2H, –CH<sub>2</sub>–), 1.25 – 2.18 (br, 145H, –CH<sub>2</sub>–, –CHCH<sub>2</sub>–). *M*<sub>n,NMR</sub> = 5100 g mol<sup>–1</sup>, *M*<sub>n,SEC</sub> = 5300 g mol<sup>–1</sup>, *D* = 1.08.

**PS<sub>53</sub>L-II:** Yield: 584 mg, 93%. <sup>1</sup>H NMR (400 MHz, CDCl<sub>3</sub>): δ 7.93 (s, 2H, Ar), 7.88 (d, *J* = 8.0 Hz, 2H, Ar), 7.46 (d, *J* = 8.0 Hz, 2H, Ar), 7.36 (m, 4H, Ar), 6.36 – 7.08 (br, 265H, –C<sub>6</sub>H<sub>5</sub>), 5.11 (m, 1H, –ArCH–), 4.24 (s, 8H, –NCH<sub>3</sub>, –PyOCH<sub>2</sub>–), 3.97 (t, 2H, *J* = 6.6 Hz, –OCH<sub>2</sub>–), 3.63 (m, 2H, –CH<sub>2</sub>–), 1.25 – 2.18 (br, 180H, –CH<sub>2</sub>–, –CHCH<sub>2</sub>–). *M*<sub>n,NMR</sub> = 6300 g mol<sup>–1</sup>, *M*<sub>n,SEC</sub> = 6200 g mol<sup>–1</sup>, *D* = 1.08.

**PS<sub>73</sub>L-II:** Yield: 781 mg, 93%. <sup>1</sup>H NMR (400 MHz, CDCl<sub>3</sub>): δ 7.93 (s, 2H, Ar), 7.88 (d, *J* = 8.0 Hz, 2H, Ar), 7.46 (d, *J* = 8.0 Hz, 2H, Ar), 7.36 (m, 4H, Ar), 6.36 – 7.08 (br, 365H, –C<sub>6</sub>H<sub>5</sub>), 5.11 (m, 1H, –ArCH–), 4.24 (s, 8H, –NCH<sub>3</sub>, –PyOCH<sub>2</sub>–), 3.97 (t, 2H, *J* = 6.6 Hz, –OCH<sub>2</sub>–), 3.63 (m, 2H, –CH<sub>2</sub>–), 1.25 – 2.18 (br, 240H, –CH<sub>2</sub>–, –CHCH<sub>2</sub>–). *M*<sub>n,NMR</sub> = 8400 g mol<sup>–1</sup>, *M*<sub>n,SEC</sub> = 8600 g mol<sup>–1</sup>, *D* = 1.05.

**Table S1** Molecular characteristics of PS<sub>*n*</sub>-Br (*n* = 14, 19, 24, 34, 41, 53, 73)

| Sample               | <i>M</i> <sub>n</sub> <sup>a</sup> | <i>D</i> <sup>a</sup> | Sample               | <i>M</i> <sub>n</sub> <sup>a</sup> | <i>D</i> <sup>a</sup> |
|----------------------|------------------------------------|-----------------------|----------------------|------------------------------------|-----------------------|
| PS <sub>14</sub> -Br | 1500                               | 1.06                  | PS <sub>41</sub> -Br | 4300                               | 1.07                  |
| PS <sub>19</sub> -Br | 2000                               | 1.08                  | PS <sub>53</sub> -Br | 5600                               | 1.09                  |
| PS <sub>24</sub> -Br | 2600                               | 1.08                  | PS <sub>73</sub> -Br | 7600                               | 1.07                  |
| PS <sub>34</sub> -Br | 3500                               | 1.10                  |                      |                                    |                       |

<sup>a</sup> The values of *M*<sub>n</sub> and *D* were obtained from SEC measurements.

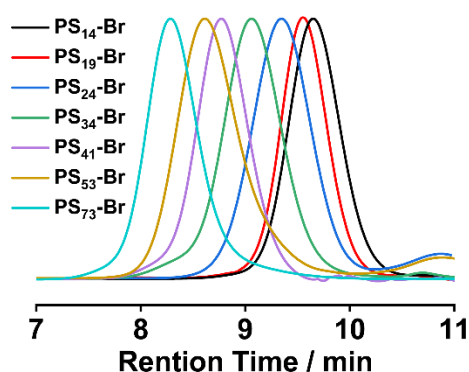

**Fig. S1** SEC traces of PS<sub>*n*</sub>-Br (*n* = 14, 19, 24, 34, 41, 53, 73).

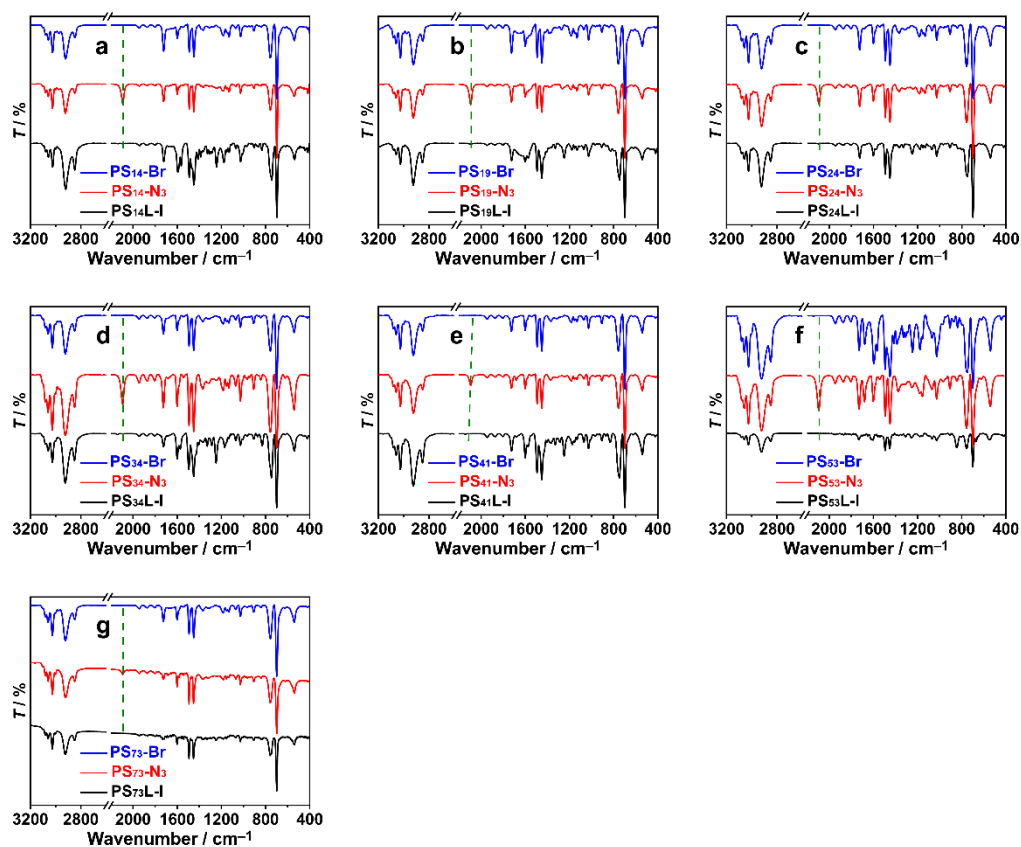

Fig. S2 FT-IR spectra of  $PS_nL\text{-Br}$ ,  $PS_n\text{-N}_3$ , and  $PS_nL\text{-I}$  ( $n = 14, 19, 24, 34, 41, 53, 73$ ).

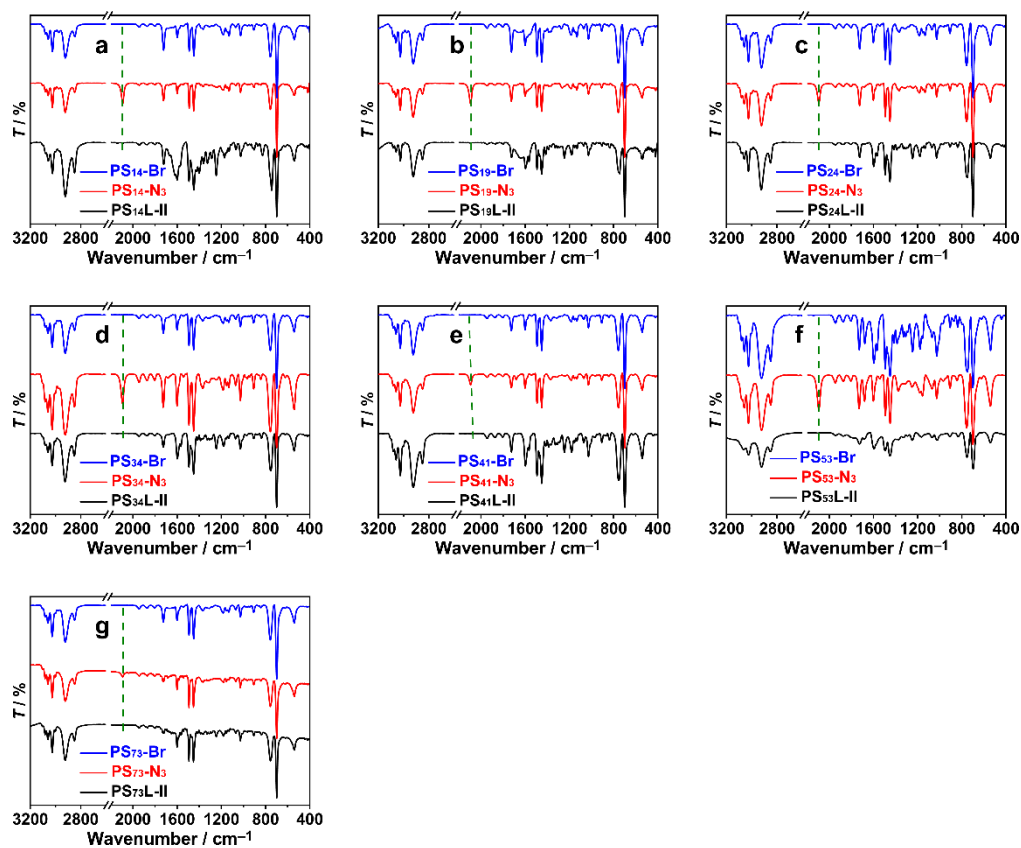

Fig. S3 FT-IR spectra of  $PS_n\text{-Br}$ ,  $PS_n\text{-N}_3$ , and  $PS_nL\text{-II}$  ( $n = 14, 19, 24, 34, 41, 53, 73$ ).

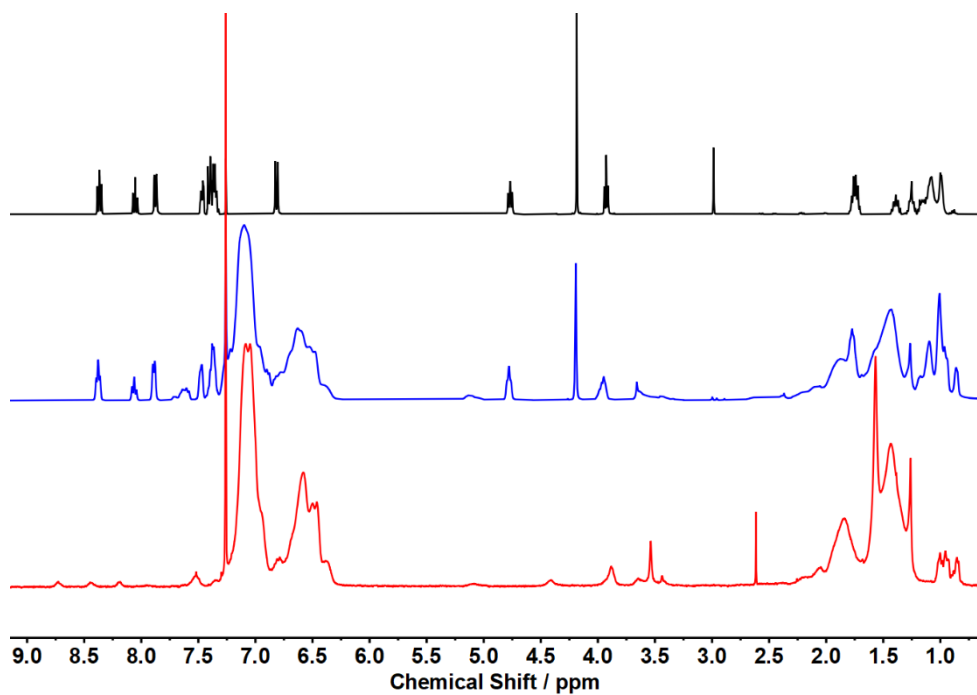

**Fig. S4** <sup>1</sup>H NMR spectra of **L-I** (Top), **PS<sub>19</sub>L-I** (Center), and **PS<sub>19</sub>Pt-I** (Bottom) in CDCl<sub>3</sub>.

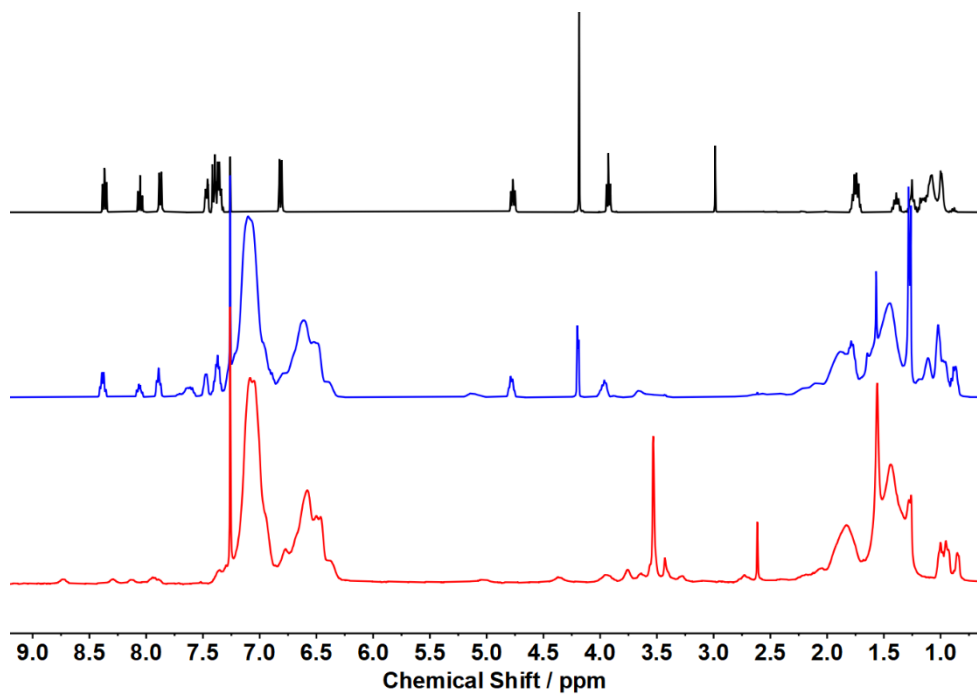

**Fig. S5** <sup>1</sup>H NMR spectra of **L-I** (Top), **PS<sub>24</sub>L-I** (Center), and **PS<sub>24</sub>Pt-I** (Bottom) in CDCl<sub>3</sub>.

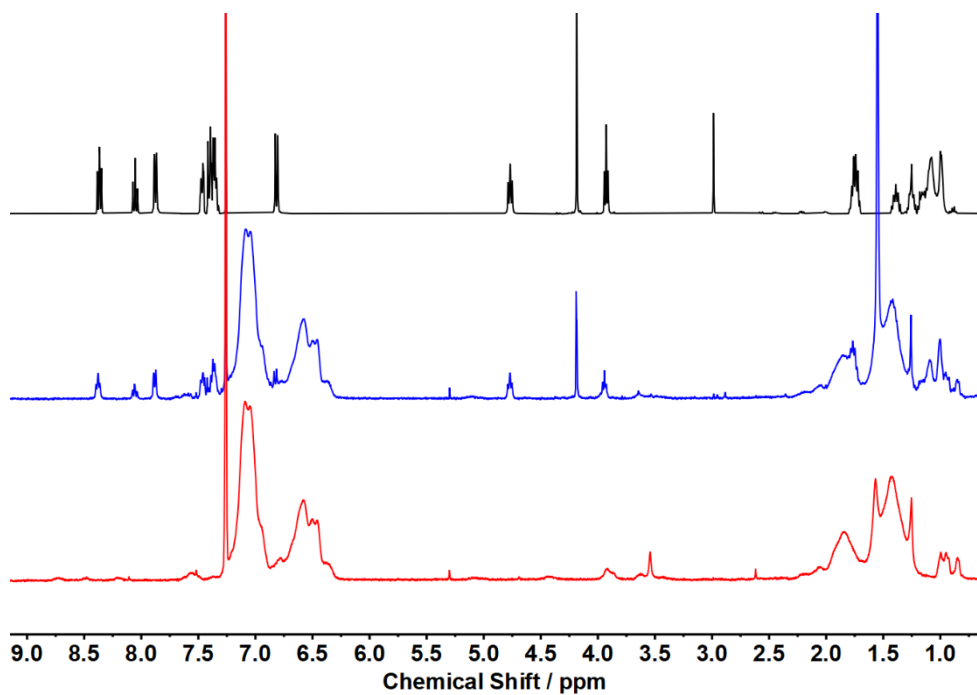

**Fig. S6** <sup>1</sup>H NMR spectra of L-I (Top), PS<sub>34</sub>L-I (Center), and PS<sub>34</sub>Pt-I (Bottom) in CDCl<sub>3</sub>.

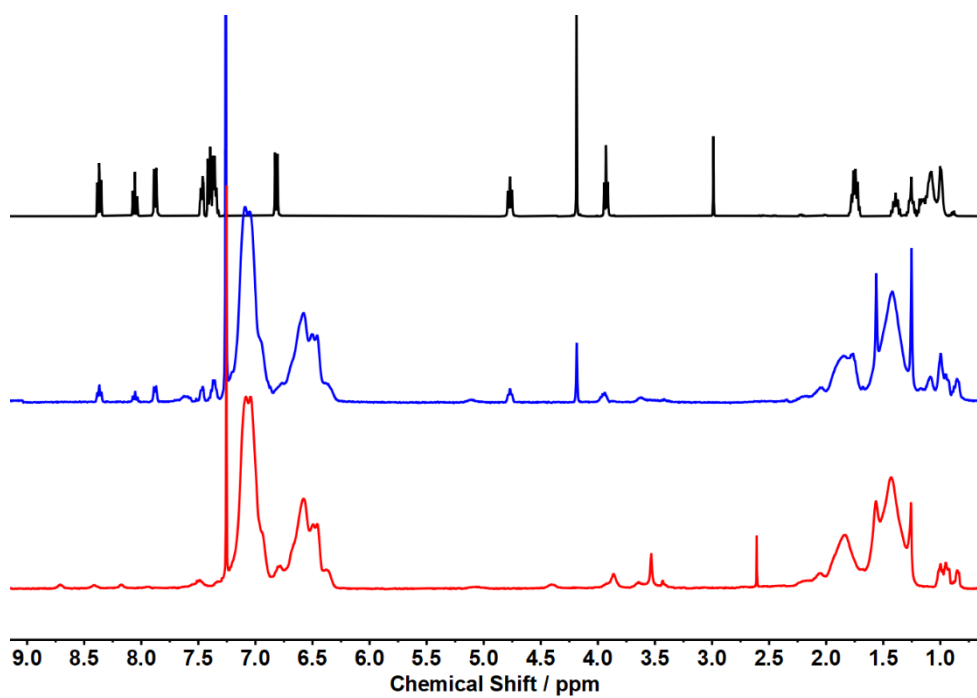

**Fig. S7** <sup>1</sup>H NMR spectra of L-I (Top), PS<sub>41</sub>L-I (Center), and PS<sub>41</sub>Pt-I (Bottom) in CDCl<sub>3</sub>.

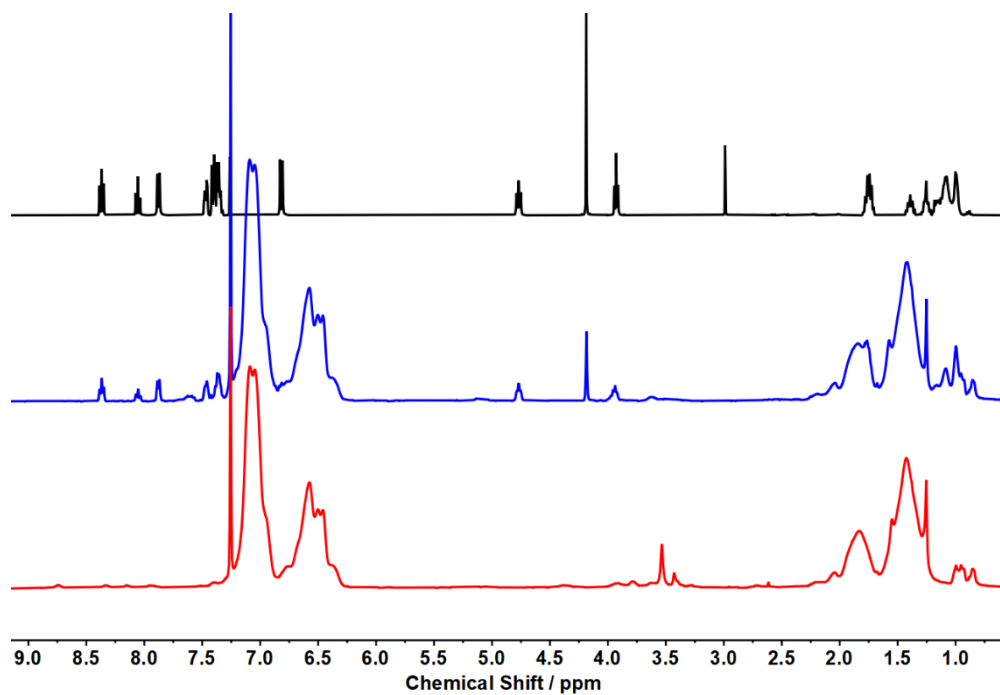

**Fig. S8** <sup>1</sup>H NMR spectra of L-I (Top), PS<sub>53</sub>L-I (Center), and PS<sub>53</sub>Pt-I (Bottom) in CDCl<sub>3</sub>.

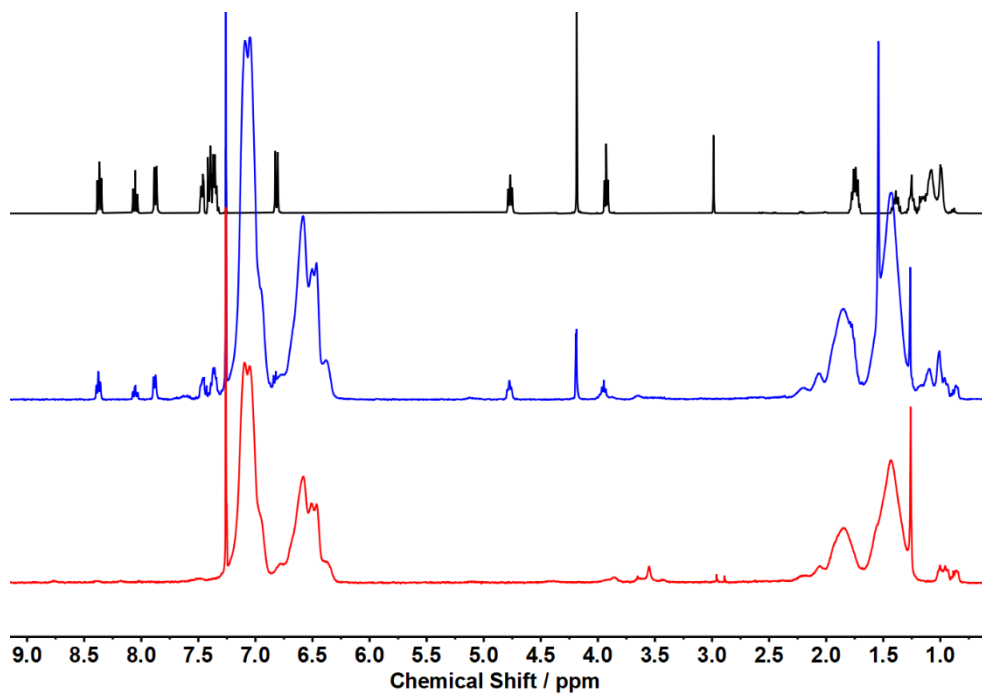

**Fig. S9** <sup>1</sup>H NMR spectra of L-I (Top), PS<sub>73</sub>L-I (Center), and PS<sub>73</sub>Pt-I (Bottom) in CDCl<sub>3</sub>.

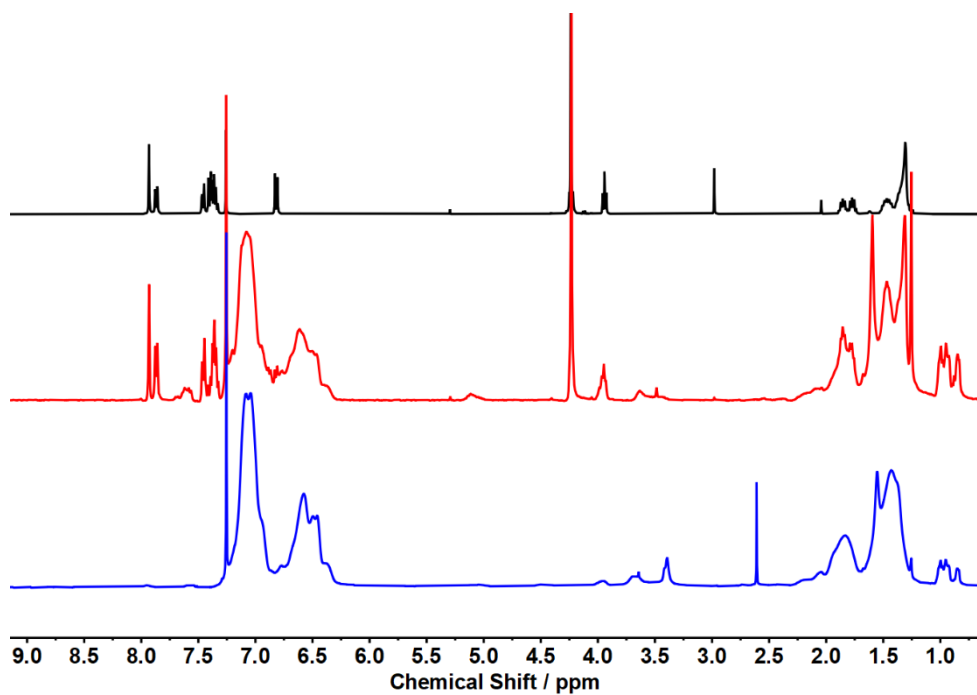

**Fig. S10** <sup>1</sup>H NMR spectra of L-II (Top), PS<sub>14</sub>L-II (Center), and PS<sub>14</sub>Pt-II (Bottom) in CDCl<sub>3</sub>.

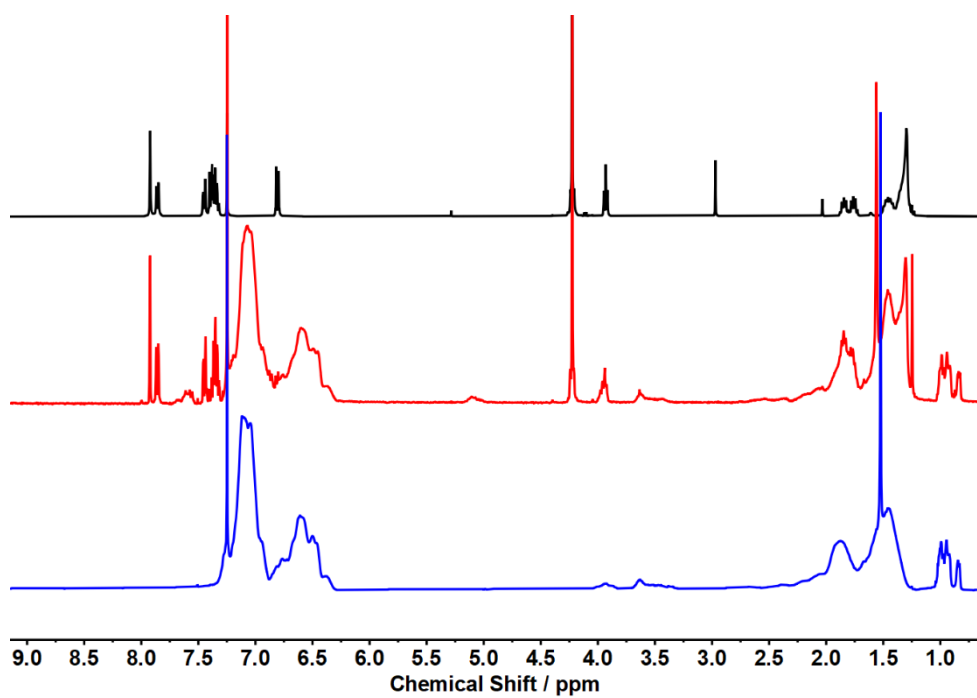

**Fig. S11** <sup>1</sup>H NMR spectra of L-II (Top), PS<sub>19</sub>L-II (Center), and PS<sub>19</sub>Pt-II (Bottom) in CDCl<sub>3</sub>.



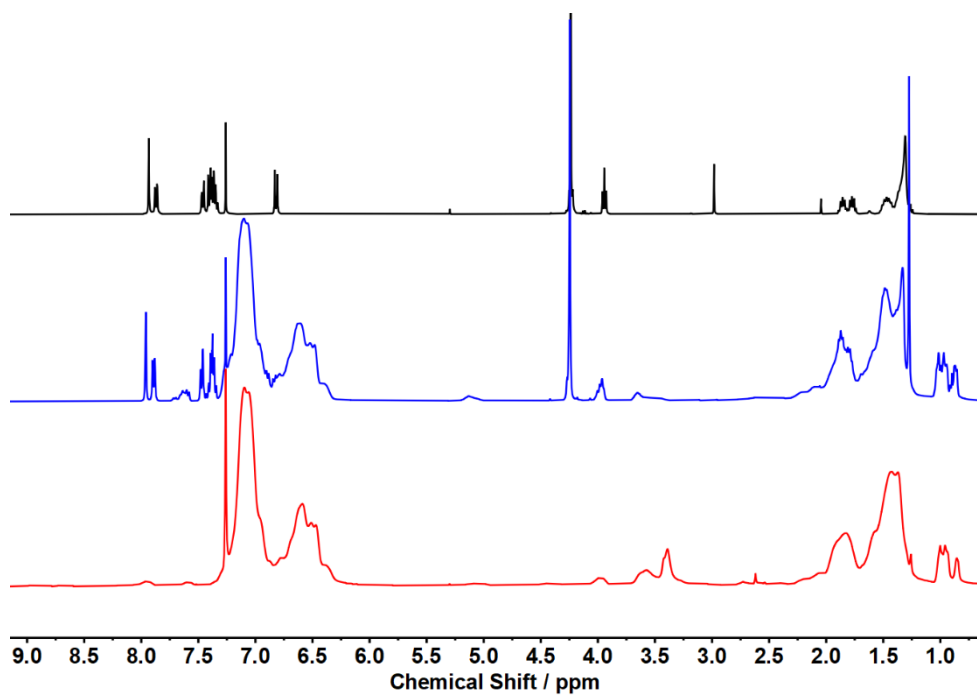

Fig. S12  $^1\text{H}$  NMR spectra of L-II (Top), PS<sub>24</sub>L-II (Center), and PS<sub>24</sub>Pt-II (Bottom) in CDCl<sub>3</sub>.

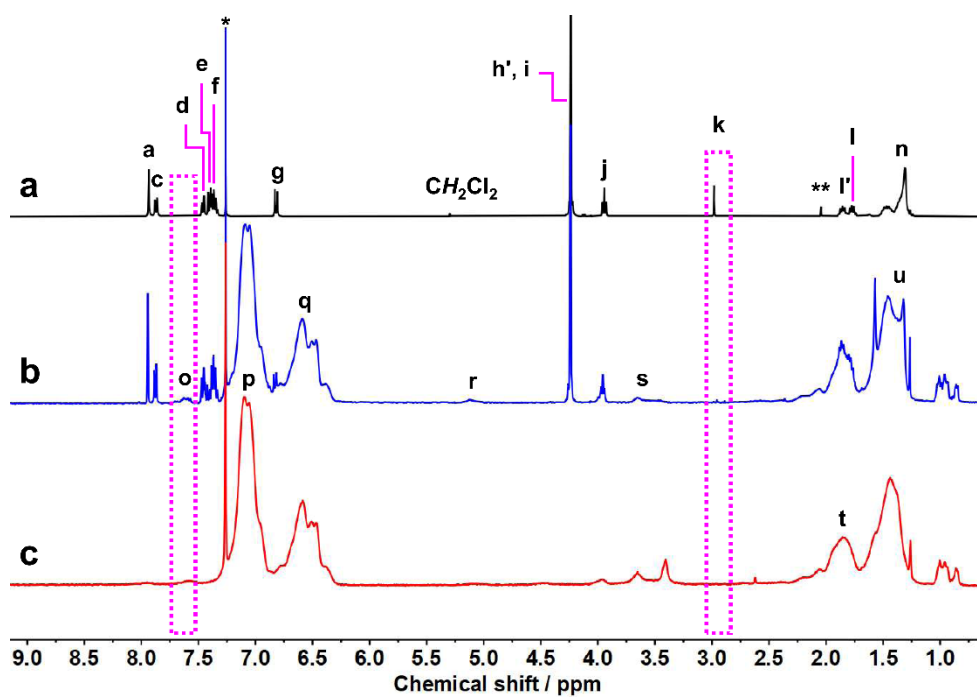

Fig. S13  $^1\text{H}$  NMR spectra of L-II (Top), PS<sub>34</sub>L-II (Center), and PS<sub>34</sub>Pt-II (Bottom) in CDCl<sub>3</sub>.

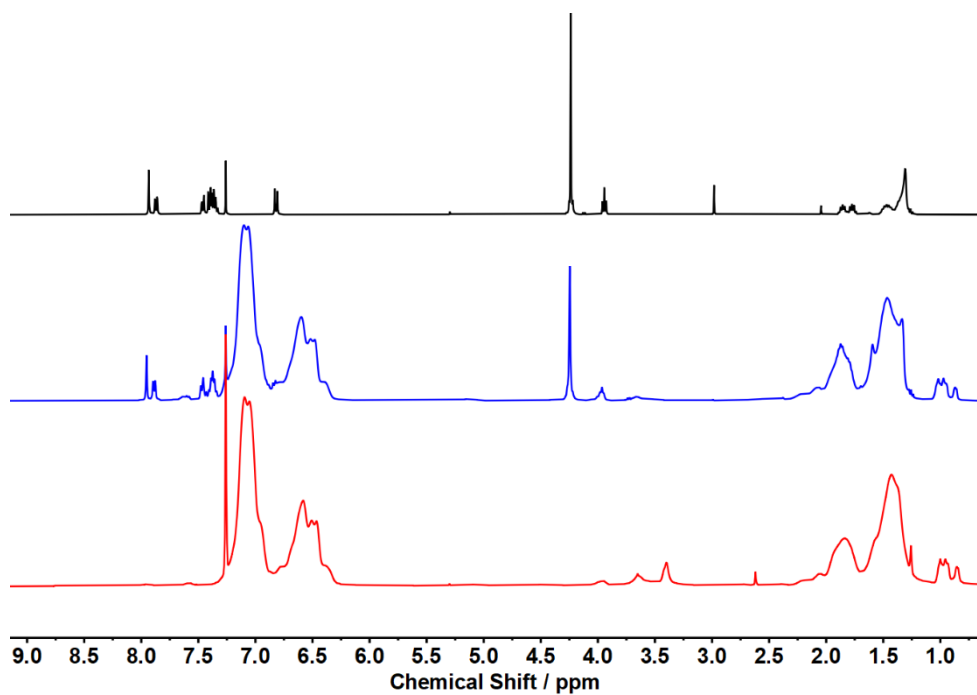

**Fig. S14** <sup>1</sup>H NMR spectra of **L-II** (Top), **PS<sub>41</sub>L-II** (Center), and **PS<sub>41</sub>Pt-II** (Bottom) in CDCl<sub>3</sub>.

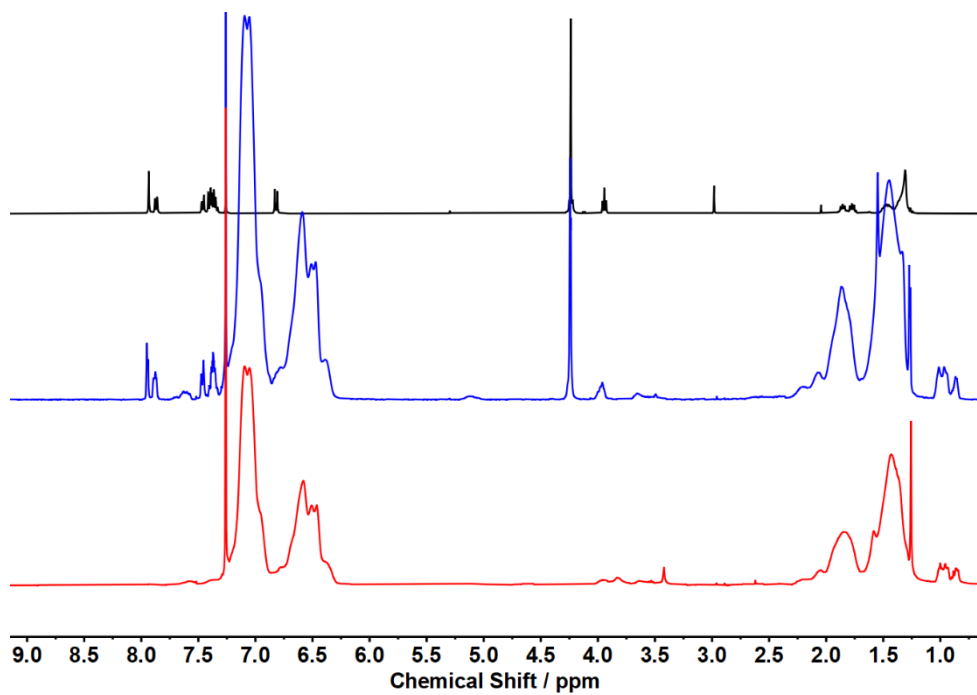

**Fig. S15** <sup>1</sup>H NMR spectra of **L-II** (Top), **PS<sub>53</sub>L-II** (Center), and **PS<sub>53</sub>Pt-II** (Bottom) in CDCl<sub>3</sub>.

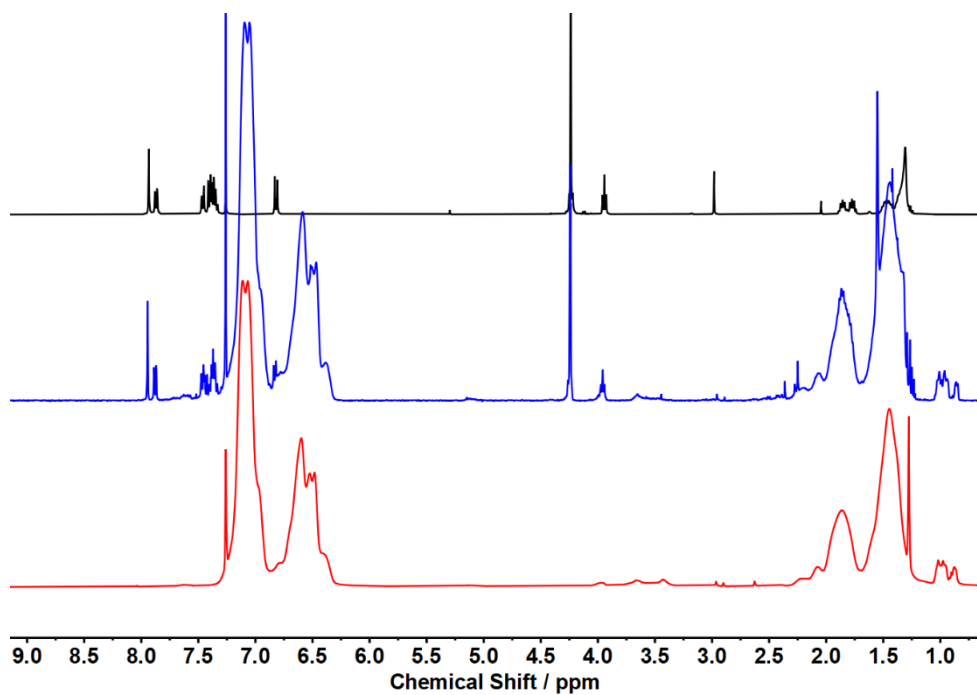

Fig. S16  $^1\text{H}$  NMR spectra of L-II (Top),  $\text{PS}_{73}\text{L-II}$  (Center), and  $\text{PS}_{73}\text{Pt-II}$  (Bottom) in  $\text{CDCl}_3$ .

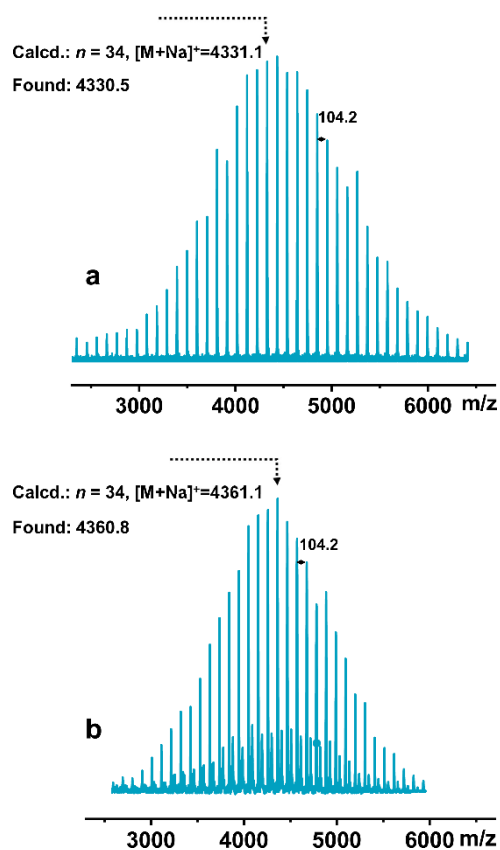

Fig. S17 MALDI-TOF mass spectra of  $\text{PS}_{34}\text{L-I}$  (a) and  $\text{PS}_{34}\text{L-II}$  (b).

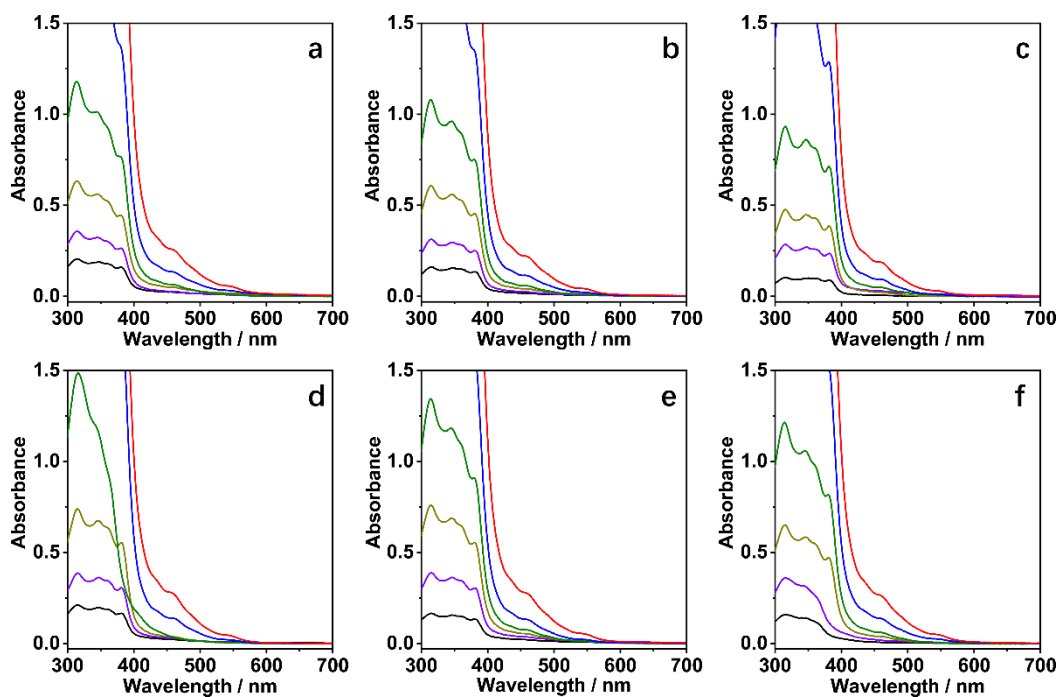

**Fig. S18** UV-vis absorption of **PS<sub>14</sub>Pt-I** (a), **PS<sub>24</sub>Pt-I** (b), **PS<sub>34</sub>Pt-I** (c), **PS<sub>41</sub>Pt-I** (d), **PS<sub>53</sub>Pt-I** (e), and **PS<sub>73</sub>Pt-I** (f) in chloroform with increasing concentration ( $6.25 \times 10^{-6}$ ,  $1.25 \times 10^{-5}$ ,  $2.5 \times 10^{-5}$ ,  $5.0 \times 10^{-5}$ ,  $1.0 \times 10^{-4}$ , and  $2 \times 10^{-4}$  mol L<sup>-1</sup>).

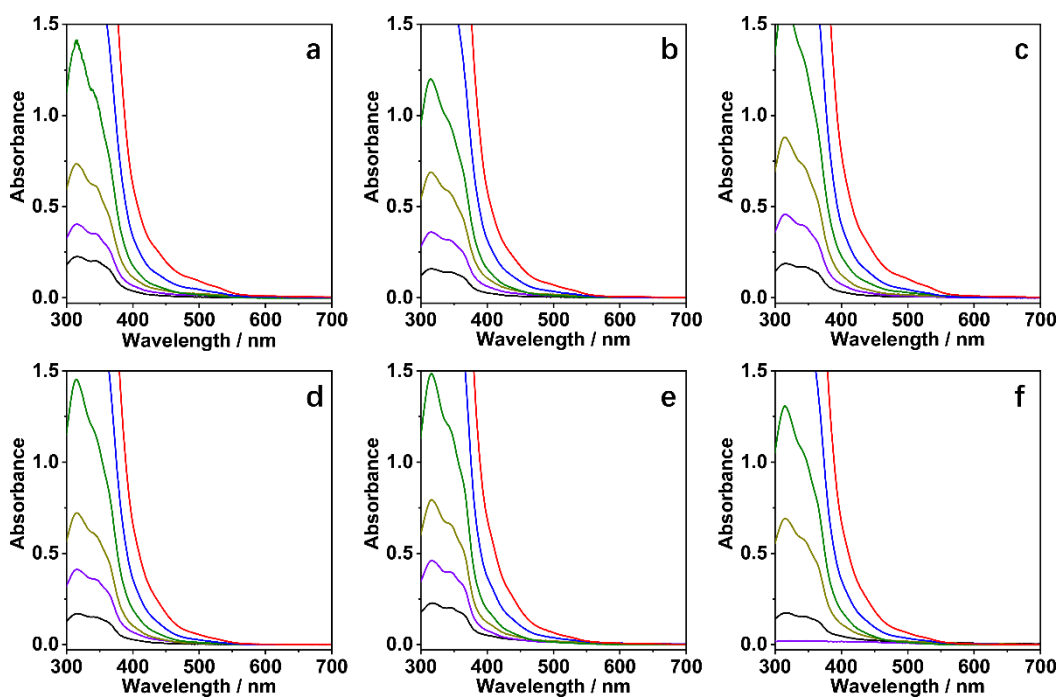

**Fig. S19** UV-vis absorption of **PS<sub>14</sub>Pt-II** (a), **PS<sub>19</sub>Pt-II** (b), **PS<sub>24</sub>Pt-II** (c), **PS<sub>34</sub>Pt-II** (d), **PS<sub>53</sub>Pt-II** (e), and **PS<sub>73</sub>Pt-I** (f) in chloroform with the increasing concentration ( $6.25 \times 10^{-6}$ ,  $1.25 \times 10^{-5}$ ,  $2.5 \times 10^{-5}$ ,  $5.0 \times 10^{-5}$ ,  $1.0 \times 10^{-4}$ , and  $2 \times 10^{-4}$  mol L<sup>-1</sup>).

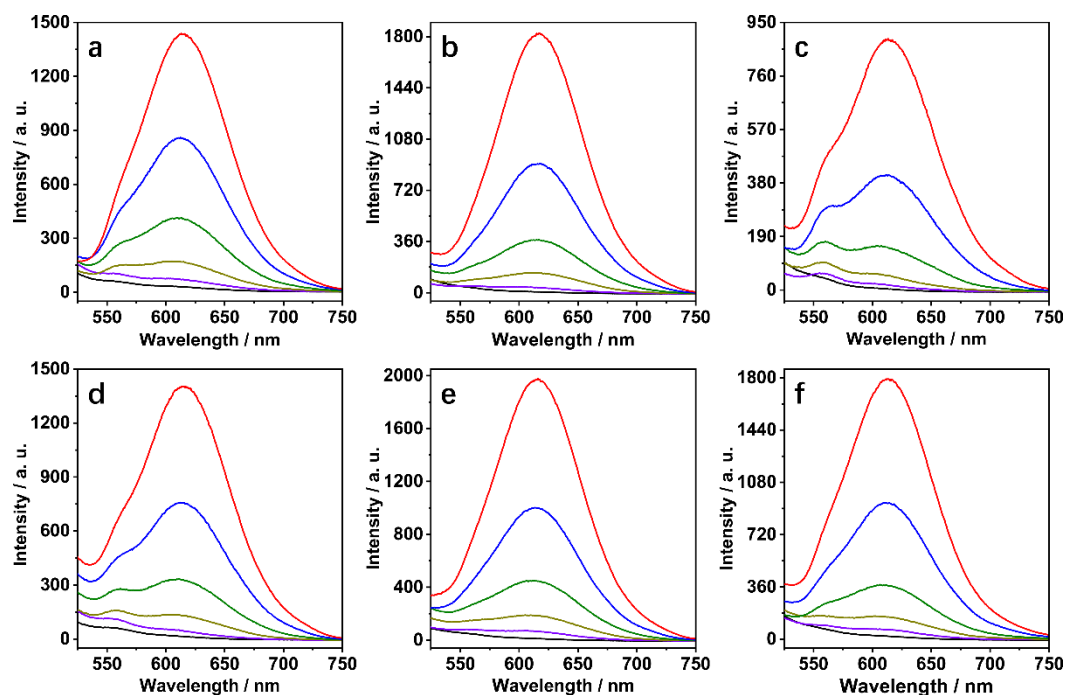

**Fig. S20** Luminescence spectra of **PS<sub>14</sub>Pt-I** (a), **PS<sub>24</sub>Pt-I** (b), **PS<sub>34</sub>Pt-I** (c), **PS<sub>41</sub>Pt-I** (d), **PS<sub>53</sub>Pt-I** (e), and **PS<sub>73</sub>Pt-I** (f) in chloroform with the increasing concentration ( $6.25 \times 10^{-6}$ ,  $1.25 \times 10^{-5}$ ,  $2.5 \times 10^{-5}$ ,  $5.0 \times 10^{-5}$ ,  $1.0 \times 10^{-4}$ , and  $2 \times 10^{-4}$  mol L<sup>-1</sup>).

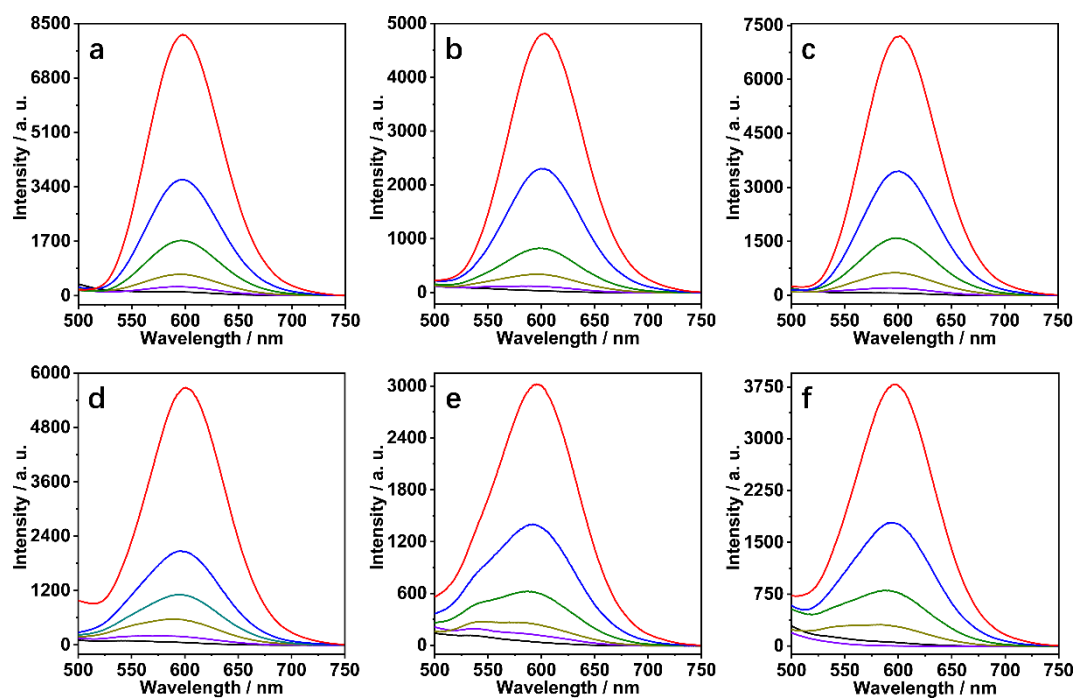

**Fig. S21** Luminescence spectra of **PS<sub>14</sub>Pt-II** (a), **PS<sub>19</sub>Pt-II** (b), **PS<sub>24</sub>Pt-II** (c), **PS<sub>34</sub>Pt-II** (d), **PS<sub>53</sub>Pt-II** (e), and **PS<sub>73</sub>Pt-II** (f) in chloroform with the increasing concentration ( $6.25 \times 10^{-6}$ ,  $1.25 \times 10^{-5}$ ,  $2.5 \times 10^{-5}$ ,  $5.0 \times 10^{-5}$ ,  $1.0 \times 10^{-4}$ , and  $2 \times 10^{-4}$  mol L<sup>-1</sup>).

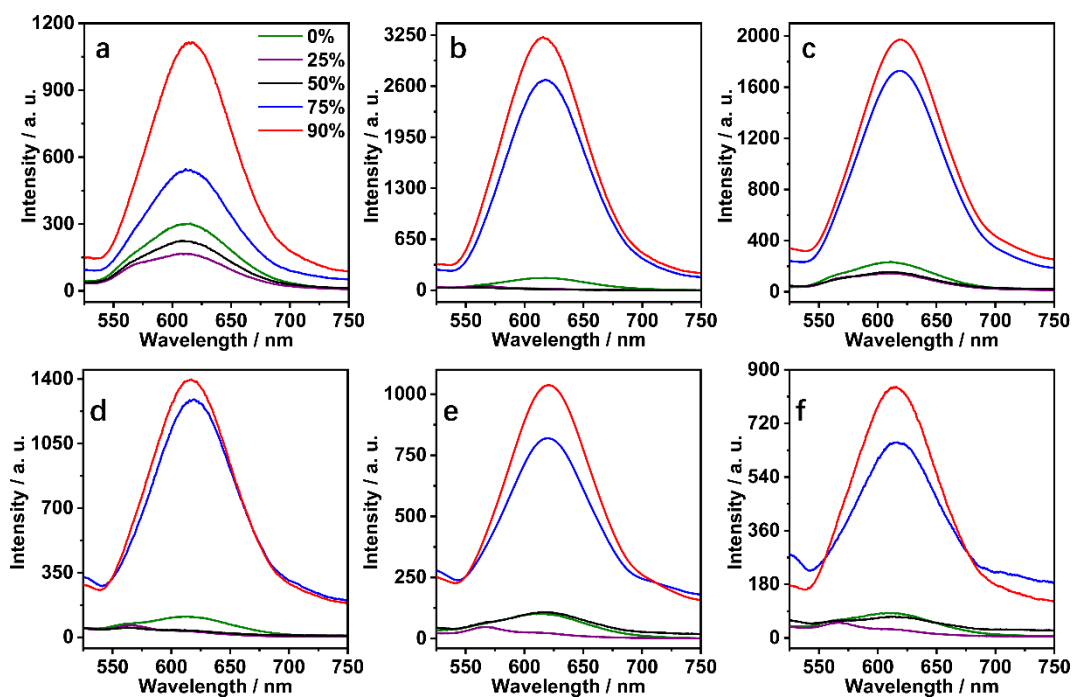

**Fig. S22** Luminescence spectra of **PS<sub>14</sub>Pt-I** (a), **PS<sub>24</sub>Pt-I** (b), **PS<sub>34</sub>Pt-I** (c), **PS<sub>41</sub>Pt-I** (d), **PS<sub>53</sub>Pt-I** (e), and **PS<sub>73</sub>Pt-I** (f) with increasing methanol content in chloroform.

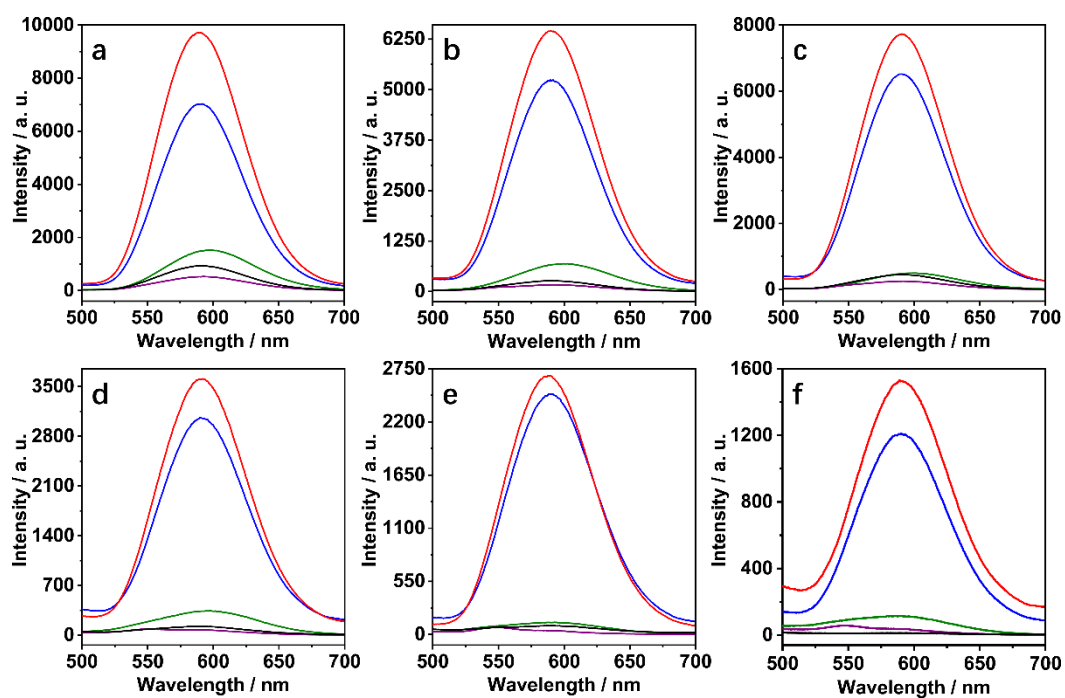

**Fig. S23** Luminescence spectra of **PS<sub>14</sub>Pt-II** (a), **PS<sub>19</sub>Pt-II** (b), **PS<sub>24</sub>Pt-II** (c), **PS<sub>34</sub>Pt-II** (d), **PS<sub>53</sub>Pt-II** (e), and **PS<sub>73</sub>Pt-II** (f) with increasing methanol content in chloroform.

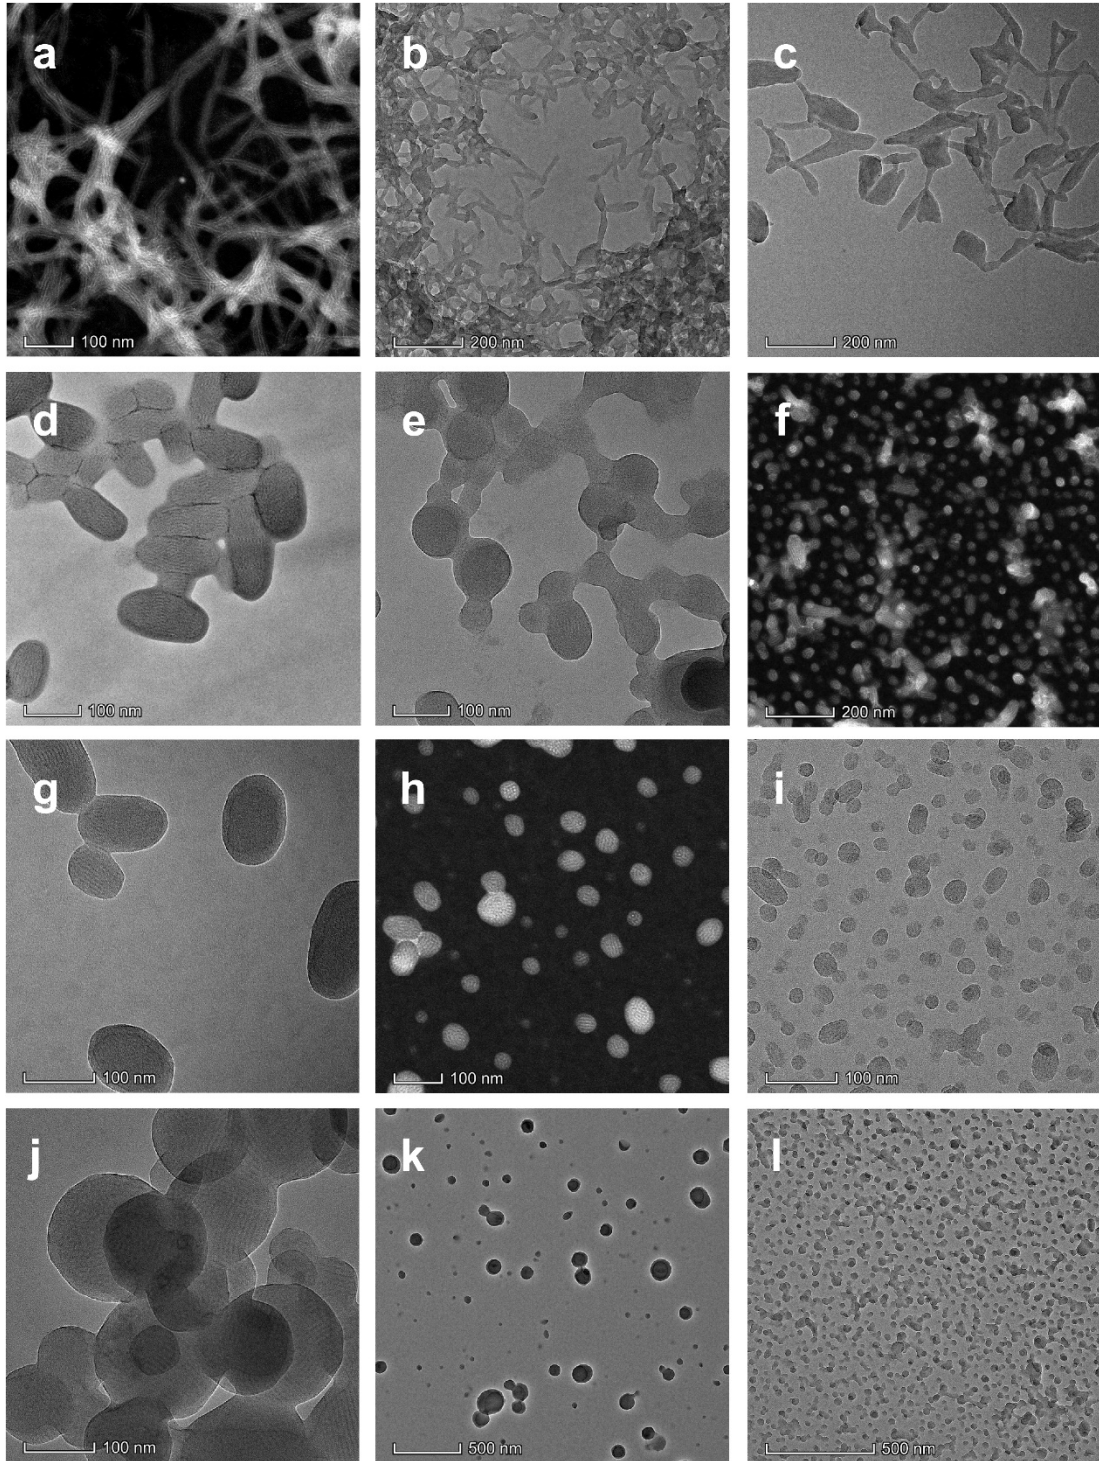

**Fig. S24 Continued**

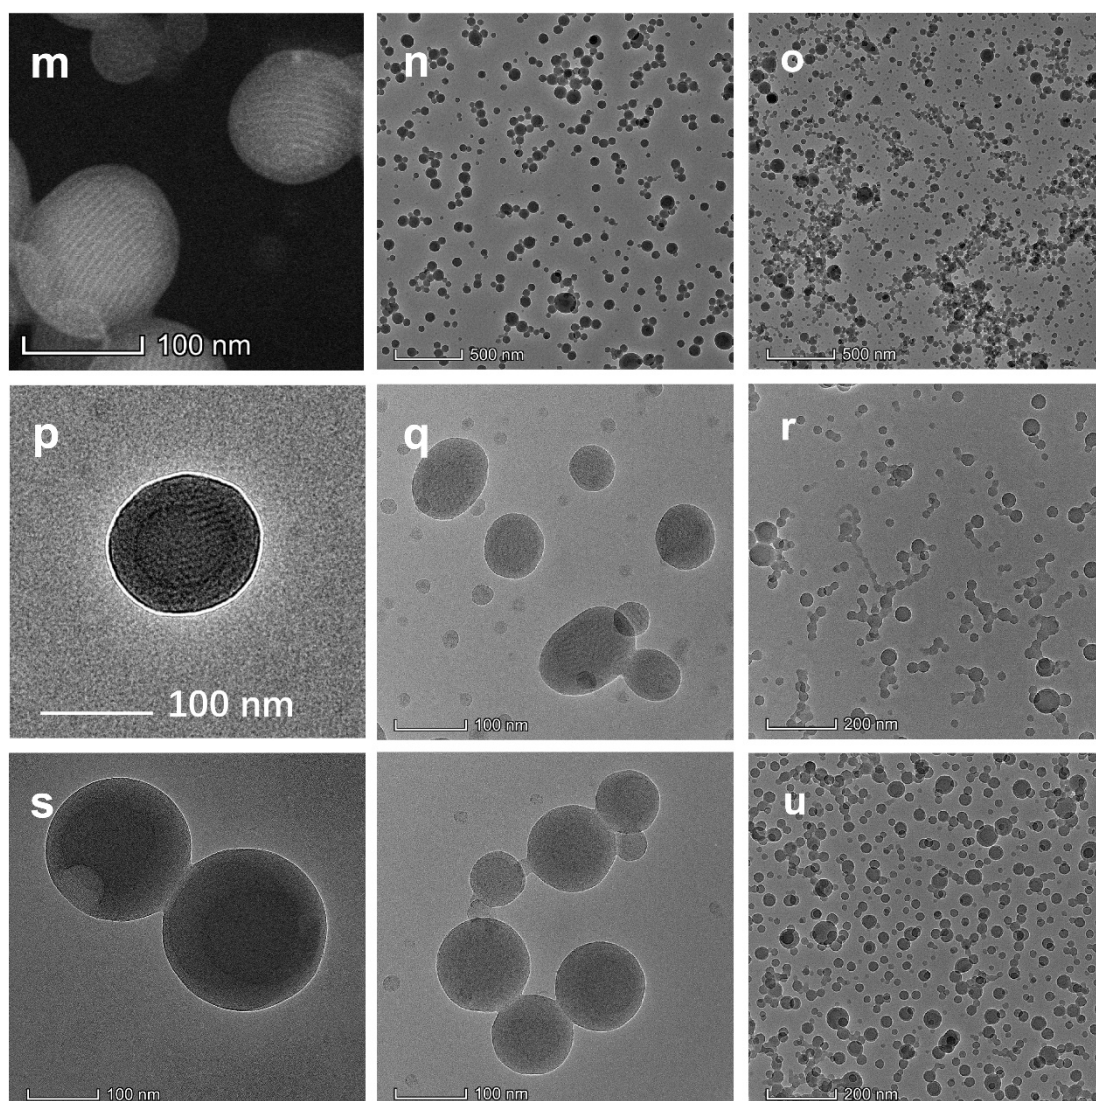

**Fig. S24** TEM images of  $\text{PS}_{14}\text{Pt-I}$  (a, b, c),  $\text{PS}_{19}\text{Pt-I}$  (d, e, f),  $\text{PS}_{24}\text{Pt-I}$  (g, h, i),  $\text{PS}_{34}\text{Pt-I}$  (j, k, l) in  $\text{PS}_{41}\text{Pt-I}$  (m, n, o),  $\text{PS}_{53}\text{Pt-I}$  (p, q, r),  $\text{PS}_{73}\text{Pt-I}$  (s, t, u) in chloroform/methanol mixture solvent with methanol contents of 50 vol%, 75 vol%, and 90 vol%.



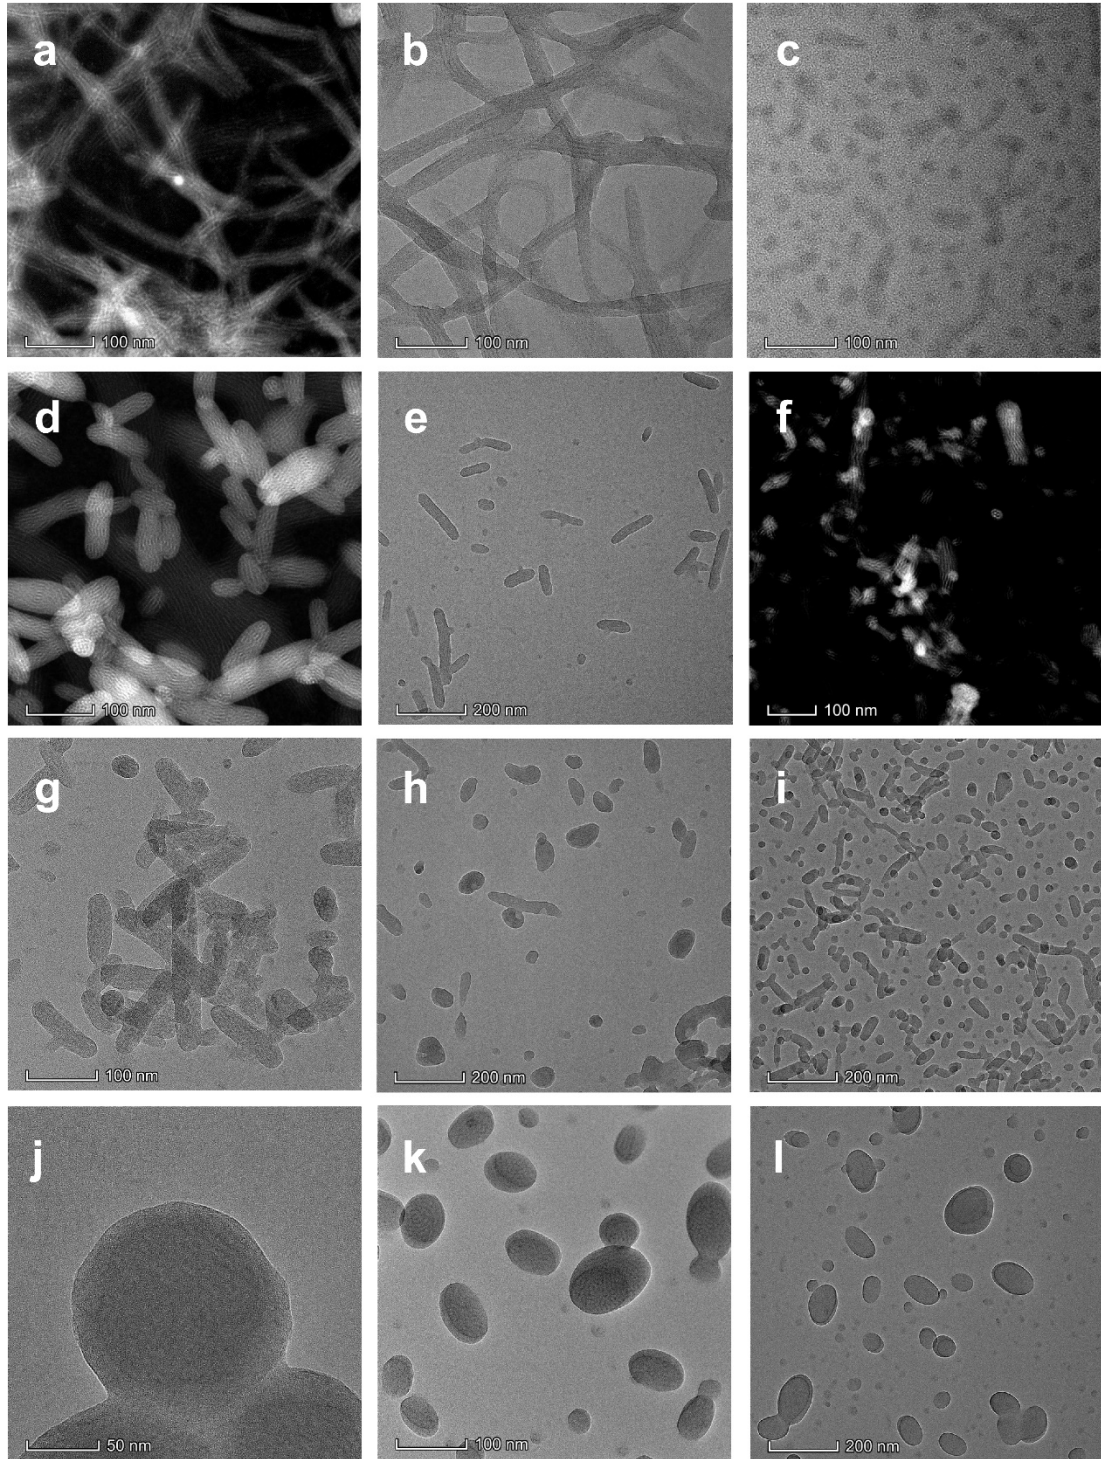

**Fig. S25 Continued**

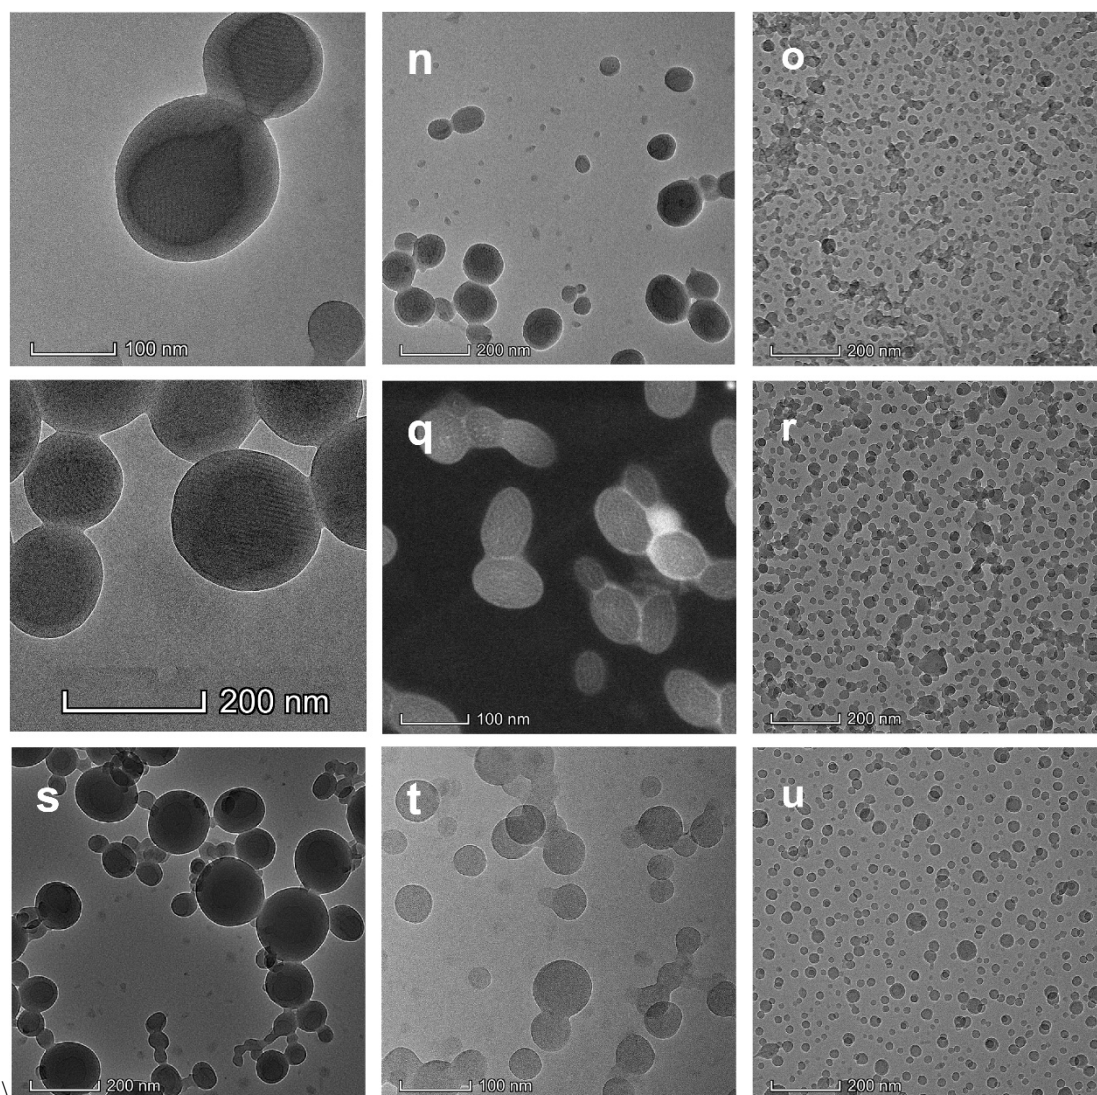

**Fig. S25** TEM images of **PS<sub>14</sub>Pt-II** (a, b, c), **PS<sub>19</sub>Pt-II** (d, e, f), **PS<sub>24</sub>Pt-II** (g, h, i), **PS<sub>34</sub>Pt-II** (j, k, l), **PS<sub>41</sub>Pt-II** (m, n, o), **PS<sub>53</sub>Pt-II** (p, q, r), **PS<sub>73</sub>Pt-II** (s, t, u) in chloroform/methanol mixture solvent with methanol contents of 50 vol%, 75 vol%, and 90 vol%.

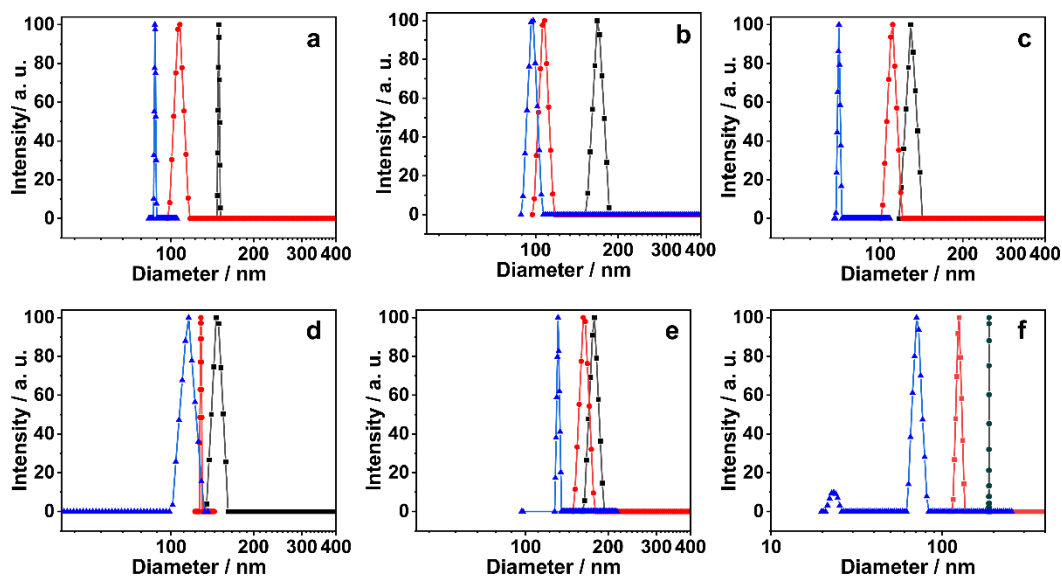

Fig. S26 DLS overlay of PS<sub>14</sub>Pt-I (a), PS<sub>19</sub>Pt-I (b), PS<sub>24</sub>Pt-I (c) PS<sub>34</sub>Pt-I (d) PS<sub>41</sub>Pt-I (e) and PS<sub>73</sub>Pt-I (f) in chloroform/methanol mixture solvent with methanol contents of 50 vol% (black), 75 vol% (red), and 90 vol%(blue).

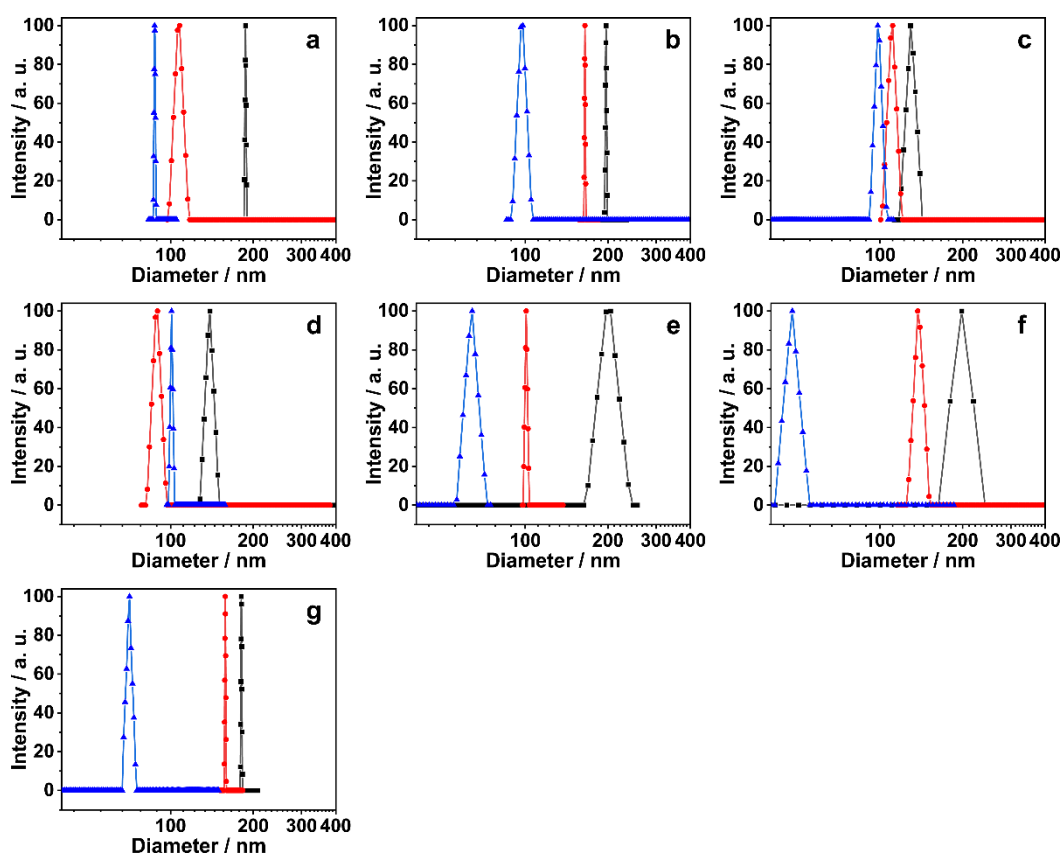

Fig. S27 DLS overlay of PS<sub>14</sub>Pt-II (a), PS<sub>19</sub>Pt-II (b), PS<sub>24</sub>Pt-II (c) PS<sub>34</sub>Pt-II (d) PS<sub>41</sub>Pt-II (e) PS<sub>53</sub>Pt-I (f), and PS<sub>73</sub>Pt-I (g) in chloroform/methanol mixture solvent with methanol contents of 50 vol% (black), 75 vol% (red), and 90 vol% (blue).
